# Supplementary material for: Effect of modified pomace on copper migration via riverbank soil in southwest China
Source: PeerJ. 2021 Jul 27;9:e11844. doi: 10.7717/peerj.11844 (PMC8323602; doi:10.7717/peerj.11844)
Supplement: Supplemental Information 1 [file peerj-09-11844-s001.xlsx]

## Sheet: morphologies
		exchangeable form mg/kg	carbonate form mg/kg	iron-manganese oxide form mg/kg	organic form mg/kg
P	GY	11.0916	19.9675	8.8164	4.6176
	NB	8.785	16.8967	6.1244	3.4369
	JL	11.1216	25.0955	8.4989	5.2113
	HC	7.827	16.2841	5.7925	3.9941
	MY	11.6372	23.215	7.553	4.8495
	SN	13.2643	17.9332	7.6257	6.331
	DZ	9.9593	14.8621	6.7163	2.9739
	GA	11.8296	25.1105	6.5588	4.6077
EP	GY	15.1901	35.8284	13.6327	7.3522
	NB	16.4833	33.5846	11.5566	7.6796
	JL	7.9273	75.3618	14.5632	3.4594
	HC	17.8863	30.0014	8.9828	5.3464
	MY	16.0903	43.2938	11.5129	8.8045
	SN	20.0945	44.1933	12.2994	8.6103
	DZ	13.379	35.7958	10.552	6.5282
	GA	24.874	47.4552	14.9661	9.758
CK	GY	5.6697	13.2091	4.7057	2.6088
	NB	4.936	12.8409	4.185	2.452
	JL	5.3308	19.9947	5.0383	3.5006
	HC	3.7642	10.9071	2.9985	4.0263
	MY	4.5641	14.6155	2.9847	4.2057
	SN	4.418	15.6105	3.6071	3.9816
	DZ	5.1285	11.3343	4.7794	3.02
	GA	7.5261	15.017	5.8472	3.6505
