# Supplementary material for: Effect of modified pomace on copper migration via riverbank soil in southwest China
Source: PeerJ. 2021 Jul 27;9:e11844. doi: 10.7717/peerj.11844 (PMC8323602; doi:10.7717/peerj.11844)
Supplement: Supplemental Information 2 [file peerj-09-11844-s002.xlsx]

## Sheet: Correlation
	exchangeable state mg/kg	carbonate state mg/kg	iron-manganese oxide state mg/kg	organic state mg/kg	TOTAL CONTENT
pH	0.487	0.4841	0.1537	0.0771	0.4468
CEC	0.7981	0.8086	0.6787	-0.7836	0.7735
TOC	-0.6045	-0.5123	-0.4345	0.6379	-0.4937
SSA	0.4125	0.5714	0.423	-0.2038	0.5396
Clay	0.8095	0.8115	0.5042	-0.5504	0.7544
pH	0.2864	0.0252	0.0252	0.1984	0.1858
CEC	0.8197	0.7794	0.0465	0.5638	0.8308
TOC	-0.5246	-0.3121	-0.2959	-0.5246	-0.5271
SSA	0.4439	0.6895	-0.0977	0.5188	0.55
Clay	0.7717	0.5697	0.2006	0.6133	0.7226
pH	0.1349	-0.0169	-0.1402	0.3506	-0.0332
CEC	0.8709	0.6834	0.0082	0.6319	0.7452
TOC	-0.6345	-0.349	0.0569	0.2499	-0.4334
SSA	0.3933	0.2077	0.3115	0.1579	0.4348
Clay	0.6965	0.405	0.0343	0.4384	0.5465
	green *
	yellow **
