# Supplementary material for: Effect of modified pomace on copper migration via riverbank soil in southwest China
Source: PeerJ. 2021 Jul 27;9:e11844. doi: 10.7717/peerj.11844 (PMC8323602; doi:10.7717/peerj.11844)
Supplement: Supplemental Information 3 [file peerj-09-11844-s003.xlsx]

## Sheet: penetration characteristics
		SN					MY					HC					JL					NB					GY					GA					DZ
	CK	P	EP			CK	P	EP			CK	P	EP			CK	P	EP			CK	P	EP			CK	P	EP			CK	P	EP			CK	P	EP
Time	adsorption of copper				Time	adsorption of copper				Time	adsorption of copper				Time	adsorption of copper				Time	adsorption of copper				Time	adsorption of copper				Time	adsorption of copper				Time	adsorption of copper
4	558.481	515.361	521.29		4	589.853	523.758	529.426		4	644.883	556.8	583.053		4	631.023	519.687	477.385		4	639.483	521.5	562.114		4	643.465	549.923	558.776		4	574.407	509.518	522.069		4	670.992	532.053	532.967
8	514.056	560.976	454.395		8	476.847	541.906	500.291		8	554.313	531.008	482.229		8	564.827	451.249	401.633		8	506.316	487.898	568.308		8	597.957	503.89	529.72		8	532.646	430.359	444.39		8	671.653	584.35	489.354
12	582.083	488.595	428.455		12	516.777	499.493	463.583		12	589.04	445.332	538.916		12	507.274	409.161	364.803		12	574.227	452.678	485.027		12	577.479	419.665	456.812		12	486.737	482.067	464.544		12	624.031	470.383	487.382
16	480.896	415.22	369.741		16	534.342	521.835	420.146		16	498.509	448.588	474.443		16	492.734	433.87	405.912		16	641.483	454.573	446.869		16	502.5	467.66	479.243		16	501.586	444.391	416.982		16	533.703	372.323	421.354
20	461.446	473.002	418.133		20	432.287	416.829	486.38		20	640.979	378.136	502.933		20	416.784	370.909	386.455		20	584.66	487.793	462.899		20	559.367	375.968	427.572		20	534.535	476.544	428.396		20	549.894	332.639	424.272
24	365.82	432.833	368.133		24	500.106	335.955	391.015		24	662.792	397.997	465.313		24	498.304	405.771	386.147		24	565.887	481.175	406.693		24	531.045	427.944	439.78		24	480.198	427.738	419.805		24	634.724	383.619	405.825
28	422.464	409.122	446.842		28	400.878	355.903	364.651		28	529.444	340.221	413.474		28	435.988	342.958	400.58		28	480.064	411.59	419.397		28	441.662	402.587	433.202		28	487.54	372.204	379.075		28	576.522	320.565	313.852
32	331.191	430.188	330.709		32	476.5	299.41	409.857		32	495.628	347.655	416.919		32	309.244	330.361	305.451		32	452.794	395.647	364.03		32	475.473	418.237	333.609		32	458.8	325.206	414.706		32	468.582	295.822	363.98
36	387.813	341.303	321.378		36	297.693	353.22	425.076		36	411.634	329.574	375.557		36	401.803	288.945	331.057		36	495.391	375.583	377.294		36	470.1	352.63	392.163		36	451.856	391.279	353.72		36	457.722	283.235	378.565
40	307.893	413.264	270.056		40	357.695	273.51	364.237		40	426.132	304.499	290.874		40	448.035	318.542	333.035		40	417.475	397.823	411.139		40	483.163	342.915	328.635		40	365.694	303.617	405.453		40	392.832	242.929	290.338
44	290.958	346.293	350.543		44	399.644	305.252	381.606		44	316.488	211.899	346.378		44	390.536	331.125	293.427		44	456.602	361.27	341.491		44	366.943	256.483	304.245		44	420.884	313.615	340.08		44	453.97	212.799	266.068
48	338.487	376.656	334.45		48	347.358	262.974	402.291		48	380.234	259.08	269.858		48	278.232	227.653	344.665		48	362.194	282.857	279.897		48	386.713	246.245	261.025		48	376.076	345.3	352.614		48	380.775	269.129	238.873
52	320.242	344.825	367.462		52	363.873	284.807	338.253		52	277.963	194.287	246.893		52	348.201	266.398	289.853		52	424	287.516	339.482		52	301.695	286.254	302.893		52	396.639	288.889	304.618		52	321.574	229.313	264.265
56	307.627	280.298	336.676		56	294.987	260.226	376.261		56	247.337	201.619	263.96		56	313.316	271.776	233.322		56	324.179	195.636	316.048		56	317.576	205.477	279.796		56	263.283	260.55	304.144		56	306.922	202.891	210.426
60	297.857	281.303	320.538		60	327.671	223.492	335.309		60	187.179	162.699	216.561		60	368.837	228.395	259.458		60	321.944	248.547	244.431		60	256.401	220.418	216.02		60	306.356	241.169	244.451		60	313.117	200.977	257.063
64	298.881	325.564	278.904		64	232.985	176.512	348.159		64	73.9764	145.6	183.912		64	245.659	291.432	234.004		64	287.248	264.826	288.929		64	259.089	239.278	204.258		64	282.863	303.276	186.118		64	275.335	217.352	212.83
68	232.339	235.173	314.544		68	244.01	191.475	272.767		68	1.29946	150.873	126.34		68	284.594	164.177	258.503		68	283.267	230.55	286.85		68	151.27	188.725	183.232		68	220.14	276.644	219.716		68	209.239	188.869	196.268
72	248.298	258.563	286.261		72	276.794	216.836	289.947		72		100.885	204.195		72	314.425	231.659	228.304		72	189.099	171.051	208.212		72	103.764	176.75	131.767		72	200.127	230.564	181.01		72	283.662	166.709	197.154
76	205.672	267.301	234.837		76	218.11	163.337	251.775		76		69.2896	139.194		76	243.054	199.065	254.373		76	191.466	186.556	255.416		76	39.8067	191.483	105.532		76	213.99	221.695	168.368		76	218.089	203.885	175.306
80	198.96	258.169	247.058		80	161.041	190.316	261.57		80		66.303	164.61		80	279.688	155.178	220.484		80	114.636	138.797	219.057		80	0.15273	146.446	146.017		80	165.868	254.177	148.868		80	170.611	154.125	168.066
84	159.316	280.256	188.428		84	201.266	144.446	329.086		84		18.3953	106.29		84	228.308	175.058	205.355		84	104.959	153.32	223.942		84	--	171.45	115.613		84	174.465	191.397	171.118		84	214.571	140.084	198.296
88	221.708	224.987	125.373		88	167.453	177.637	220.017		88		18.9424	101.432		88	245.379	226.691	205.128		88	26.0815	108.606	182.313		88	--	81.4143	114.813		88	130.745	215.815	149.596		88	137.085	138.263	154.844
92	172.961	206.941	159.346		92	126.032	140.085	251.646		92		5.74094	79.5147		92	198.817	200.216	162.41		92	-1.16	112.619	166.986		92	--	95.531	97.8473		92	134.071	183.797	117.523		92	150.562	132.708	160.622
96	153.774	217.67	183.022		96	163.201	149.084	235.388		96		0.51562	68.2647		96	172.376	116.074	154.067		96	--	71.7307	189.948		96	--	74.3733	62.2636		96	113.582	212.562	129.162		96	83.6328	128.394	169.498
100	113.723	197.893	161.26		100	91.1379	152.516	283.067		100			19.4112		100	196.338	174.758	179.388		100	--	67.9655	135.575		100	--	77.6564	63.1984		100	92.64	152.032	162.375		100	80.3311	107.211	147.865
104	124.875	128.895	194.396		104	97.5876	97.2285	168.576		104			12.5986		104	145.521	116.377	160.3		104	--	72.4533	151.647		104	--	26.3939	41.3778		104	59.1073	172.245	157.772		104	26.0413	110.842	127.216
108	137.593	168.273	182.277		108	66.1145	96.8244	190.434		108			7.98896		108	142.167	153.995	128.358		108	--	58.7227	75.7236		108	--	7.83152	49.1367		108	50.2792	111.335	133.272		108	-0.7831	56.1556	101.437
112	85.4585	122.88	159.385		112	42.4615	104.634	165.969		112			0.8565		112	148.995	139.795	129.123		112	--	30.4405	82.7037		112	--	-0.66283	28.5333		112	29.2766	132.669	99.5208		112	--	54.7612	119.703
116	82.1362	151.991	126.902		116	38.0073	82.6985	187.195							116	81.2139	106.747	129.766		116	--	19.487	62.0844		116	--	--	23.0182		116	0.48323	127.424	114.516		116	--	45.7906	86.0277
120	78.71	131.404	136.528		120	27.9982	85.7861	182.988							120	95.2636	132.023	153.598		120	--	-1.07273	36.8093		120	--	--	24.92		120	--	88.53	79.6218		120	--	36.5772	67.6504
124	69.3614	114.765	96.3398		124	15.5222	64.9189	139.197							124	105.152	145.075	133.07		124	--	--	22.0936		124	--	--	3.21899		124	--	81.2933	77.1211		124	--	31.5812	60.5897
128	35.4824	71.7606	111.17		128	0.46485	71.1327	138.652							128	106.477	97.9267	118.772		128	--	--	16.7976		128	--	--	1.16889		128	--	64.0718	81.5372		128	--	10.5953	69.4044
132	31.7426	122.505	78.6541		132		36.8056	136.256							132	72.3257	102.625	102.366		132	--	--	10.4469		132	--	--	-0.60215		132	--	39.6608	46.92		132	--	4.09387	56.1329
136	13.007	75.3205	90.7853		136		41.4255	113.963							136	62.8649	82.1316	122.345		136	--	--	4.41542		--	--	--	--		136	--	38.2007	43.6798		136	--	-2.04202	39.094
140	0.09253	104.48	74.8998		140		27.1	120.69							140	59.5011	77.3215	116.602		140	--	--	1.49993		--	--	--	--		140	--	13.1885	44.6426		140	--	--	11.5527
144		64.878	76.4807		144		23.2491	87.9922							144	28.1594	107.972	127.481		144		--	0.41933		--		--	--		144		7.10768	42.9267		144		--	4.94848
148		60.2582	60.171		148		12.358	76.5909							148	17.5404	99.2542	96.7946		--		--	--		--		--	--		148		0.11131	26.8909		148		--	4.00061
152		53.9511	41.2229		152		4.40646	58.3411							152	17.3133	77.6096	108.576		--		--	--		--		--	--		152		--	15.417		152		--	-0.88909
156		44.9824	40.5703		156		-0.56209	44.8129							156	11.1011	48.2351	80.551		--		--	--		--		--	--		156		--	3.64519		--		--	--
160		16.4798	17.5481		160			55.0465							160	5.39387	60.102	78.5351		--		--	--		--		--	--		160		--	1.12444		--		--	--
164		26.7291	27.7622		164			24.1298							164	0.07232	28.6089	94.6282		--		--	--		--		--	--		164		--	-1.02155		--		--	--
168		12.8618	14.4649		168			20.1622							168		13.9102	59.8896		--		--	--		--		--	--		--		--	--		--		--	--
172		2.24424	20.0909		172			8.43152							172		12.6807	61.9544		--		--	--		--		--	--		--		--	--		--		--	--
176			5.50795		176			1.69172							176		13.0562	63.3326		--			--		--			--		--			--		--			--
180			5.94667		180			-0.22391							180		5.03273	48.1426		--			--		--			--		--			--		--			--
184			4.20559												184		0.09838	36.7178		--			--		--			--		--			--		--			--
188			4.1736												188			33.8262		--			--		--			--		--			--		--			--
192			0.34229												192			34.5671		--			--		--			--		--			--		--			--
															196			16.6831
															200			4.81185
															204			3.09778
															208			0.5204
