# Supplementary material for: Effect of modified pomace on copper migration via riverbank soil in southwest China
Source: PeerJ. 2021 Jul 27;9:e11844. doi: 10.7717/peerj.11844 (PMC8323602; doi:10.7717/peerj.11844)
Supplement: Supplemental Information 4 [file peerj-09-11844-s004.xlsx]

## Sheet: morphologies
			exchangeable form mg/kg	carbonate form mg/kg	iron-manganese oxide form mg/kg	organic form mg/kg
CK	CX	0-5 cm	1.19833	4.97244	0.805718	1.07973
		5-10 cm	1.25376	4.30204	0.770417	0.976366
		10-15 cm	1.19925	3.07119	0.714061	0.936799
		15-20 cm	0.912751	2.26987	0.694521	1.21282
	NB	0-5 cm	1.57251	5.04046	0.648415	0.72437
		5-10 cm	1.39188	4.14411	0.924222	1.25285
		10-15 cm	0.818097	3.71334	0.95527	0.949143
		15-20 cm	0.635559	2.71258	1.07923	1.05521
	GP	0-5 cm	1.47539	6.73151	1.00036	0.881604
		5-10 cm	1.25285	3.86679	1.14644	0.880496
		10-15 cm	1.36006	5.00402	1.09406	0.708208
		15-20 cm	1.2425	4.3924	1.79739	1.03029
	HC	0-5 cm	1.1761	3.52838	0.903158	1.23782
		5-10 cm	0.989469	2.62144	0.645236	1.17265
		10-15 cm	0.82304	2.60413	0.538764	0.755335
		15-20 cm	0.775563	2.1532	0.911331	0.860549
	MY	0-5 cm	1.54599	6.11885	1.67412	1.19104
		5-10 cm	1.35919	5.15423	1.22538	1.04932
		10-15 cm	1.01372	2.76454	1.2408	1.02584
		15-20 cm	1.1495	3.16756	0.912998	0.996657
	SN	0-5 cm	1.87448	6.53184	1.55831	0.914068
		5-10 cm	1.3398	5.12774	1.34731	1.10906
		10-15 cm	1.16034	4.32207	1.0244	0.979714
		15-20 cm	0.818721	2.17462	1.09432	0.719724
	DZ	0-5 cm	1.48857	6.59045	1.34104	1.30889
		5-10 cm	1.08638	5.15485	1.04282	1.12954
		10-15 cm	1.26317	3.48277	0.885117	1.047
		15-20 cm	0.91301	1.69844	0.844022	0.817966
	GA	0-5 cm	1.60167	5.23721	1.00718	1.25979
		5-10 cm	1.23843	4.24565	0.983816	1.09825
		10-15 cm	1.12671	4.59763	0.609272	0.765384
		15-20 cm	1.0164	3.8164	1.12785	1.07807
P	CX	0-5 cm	3.00278	4.37836	2.14909	0.852375
		5-10 cm	2.20176	2.45055	1.51577	0.881031
		10-15 cm	1.60429	2.1286	0.878044	0.960025
		15-20 cm	1.63357	1.67867	0.676013	0.890868
	NB	0-5 cm	3.20933	4.17117	0.767452	0.883656
		5-10 cm	3.03818	2.99367	0.724853	0.731837
		10-15 cm	1.21984	2.95046	1.02491	0.898801
		15-20 cm	1.2485	2.1057	0.99975	0.817256
	GP	0-5 cm	3.8822	4.3981	1.70917	1.18937
		5-10 cm	2.79865	4.12506	0.812344	0.852962
		10-15 cm	2.78007	3.25145	0.680587	0.853026
		15-20 cm	2.22487	2.62037	0.921498	0.900039
	HC	0-5 cm	2.56918	3.84691	1.96962	0.951069
		5-10 cm	2.14442	3.21258	1.31075	0.8162
		10-15 cm	1.82401	2.08531	0.600141	0.877956
		15-20 cm	1.00238	2.19961	0.37393	0.729867
	MY	0-5 cm	3.91805	3.48889	1.22467	1.14587
		5-10 cm	2.59067	3.69502	1.36493	0.886926
		10-15 cm	2.05719	2.90661	0.480418	0.837315
		15-20 cm	2.26021	2.33238	0.781417	0.878919
	SN	0-5 cm	3.60222	4.3996	1.52187	1.13453
		5-10 cm	2.92462	3.39825	1.15461	0.947601
		10-15 cm	2.37092	2.59707	0.874917	0.872526
		15-20 cm	1.98849	2.45798	0.870883	0.756015
	DZ	0-5 cm	3.44229	4.89211	2.01832	1.30015
		5-10 cm	2.5323	3.43412	1.3016	0.940263
		10-15 cm	2.17947	2.72531	0.385346	0.823032
		15-20 cm	1.54113	1.78156	1.05719	0.719895
	GA	0-5 cm	3.79069	4.33438	2.40238	1.04985
		5-10 cm	2.84666	3.48243	1.49826	0.876979
		10-15 cm	1.82264	2.7224	0.986258	0.819091
		15-20 cm	2.03093	2.60905	0.484652	0.871886
EP	CX	0-5 cm	2.87044	6.43079	3.06063	0.955094
		5-10 cm	2.20341	4.63313	2.1003	0.709682
		10-15 cm	2.11571	2.33099	1.46571	0.676852
		15-20 cm	1.58138	0.189706	0.963912	0.841077
	NB	0-5 cm	2.90615	4.64056	1.71915	1.26278
		5-10 cm	2.18975	3.90481	1.08155	0.990568
		10-15 cm	2.00117	3.40177	1.16133	1.16309
		15-20 cm	1.90921	3.4904	1.01127	0.843309
	GP	0-5 cm	4.79693	7.76166	3.05013	1.1641
		5-10 cm	3.86283	5.2161	1.40938	1.00221
		10-15 cm	3.87606	4.04382	1.29863	1.06204
		15-20 cm	3.01693	2.26575	1.04611	1.00959
	HC	0-5 cm	2.34529	4.41941	2.73279	0.973146
		5-10 cm	1.85248	4.13851	1.41676	0.691486
		10-15 cm	2.11941	3.26332	1.21274	0.821231
		15-20 cm	2.03246	3.2696	1.58268	0.694532
	MY	0-5 cm	4.33208	6.39162	1.95978	1.24245
		5-10 cm	3.4713	4.9337	1.09452	1.06505
		10-15 cm	2.59322	4.14119	1.50554	1.04147
		15-20 cm	2.58572	4.20853	1.55812	0.808211
	SN	0-5 cm	4.36822	7.46551	2.55601	1.30679
		5-10 cm	3.83247	4.71342	1.8929	1.03825
		10-15 cm	3.54474	3.64749	1.10878	0.928593
		15-20 cm	2.2691	3.09614	1.17478	1.02029
	DZ	0-5 cm	3.16852	5.15113	3.72359	0.914745
		5-10 cm	2.83651	4.0255	2.07959	1.01666
		10-15 cm	2.33726	3.64273	2.86053	0.72622
		15-20 cm	2.24566	2.92109	2.96042	0.652614
	GA	0-5 cm	3.78258	6.64382	4.85642	1.21541
		5-10 cm	3.01266	4.66441	3.59652	1.07659
		10-15 cm	2.33097	3.45969	2.10668	0.889643
		15-20 cm	2.13052	3.02818	2.23209	0.747638
